# Supplementary material for: Venetoclax-based therapies in pediatric advanced MDS and relapsed/refractory AML: a multicenter retrospective analysis
Source: PubMed Central journal article supplement — Blood Adv. 2023 May 24;7(16):4366–70. doi: 10.1182/bloodadvances.2023010113 (PMC10432591; doi:10.1182/bloodadvances.2023010113), 2023-05-24
Supplement: BLOODA_ADV-2023-010113-mmc1.pdf [file BLOODA_ADV-2023-010113-mmc1.pdf]

**Supplementary Table S1:** Detailed information regarding patients' characteristics. AML: acute myeloid leukemia; BM: bone marrow; HSCT: hematopoietic stem cell transplantation; MDS: myelodysplastic syndrome; Refr: refractory; Rel: relapsed; T-: post-cytotoxic therapy; MDS-EB: MDS with excess of blasts; BM: bone marrow; N/A: not available

| ID   | ID EWOG | Sex | Diagnosis  | Age at diagnosis | MDS ICC | Germline variants            | Blasts at diagnosis (% in BM) | Cytogenetics ‡         | Molecular biology ‡             | Previous antineoplastic therapies | Previous allogenic HSCT † | % blasts at the time of venetoclax start | Extramedullary disease at the time of venetoclax start |
|------|---------|-----|------------|------------------|---------|------------------------------|-------------------------------|------------------------|---------------------------------|-----------------------------------|---------------------------|------------------------------------------|--------------------------------------------------------|
| 1    |         | M   | Refr AML   | 10.5             |         | no                           | 71                            | Complex, t(9;22)       | FLT3-ITD; BCR-ABL1p210          | yes                               | no                        | 80%                                      | no                                                     |
| 2    |         | M   | Refr AML   | 5.1              |         | no                           | 20                            | Normal                 | -                               | yes                               | no                        | 5%                                       | no                                                     |
| 3    |         | M   | Refr AML   | 13.1             |         | no                           | N/A                           | Del(3)                 | FLT3-ITD                        | yes                               | no                        | 35%                                      | no                                                     |
| 4    |         | M   | T-MDS/AML  | 7.7              |         | no                           | 60                            | t(11;17)               | MLL rearrangement               | no                                | no                        | 60%                                      | no                                                     |
| 5    |         | F   | MDS        | 15.5             | MDS-EB  | LIG4 and SH2B3 heterozygosis | 6                             | -7                     | RIT1, EZH2, SETBP1, ASXL1, ETV6 | no                                | no                        | 30%                                      | no                                                     |
| 6    |         | F   | Rel AML    | 8.3              |         | no                           | 45                            | Normal                 | -                               | yes                               | yes (1)                   | 45%                                      | no                                                     |
| 7    |         | F   | Rel AML    | 10.2             |         | no                           | 26%                           | normal                 | -                               | yes                               | no                        | 26%                                      | no                                                     |
| 8    |         | F   | T- MDS/AML | 5.2              |         | SDHC heterozygosis           | 30                            | t(9;11)                | MLL-AF9                         | yes                               | no                        | 30%                                      | no                                                     |
| 9    |         | F   | T- MDS/AML | 1.3              |         | no                           | 13                            | Hyper diploid, t(4;11) | MLL-AF1                         | yes                               | no                        | 0%                                       | no                                                     |
| 10 ¶ | D1223   | M   | MDS        | 14               | MDS-EB  | no                           | 10                            | Del(7q)                | -                               | yes                               | yes (2)                   | N/A                                      | no                                                     |
| 11   | D1471   | M   | T-MDS/AML  | 10.8             |         | no                           | 10                            | -7                     | -                               | yes                               | no                        | 14%                                      | no                                                     |
| 12   |         | F   | Refr AML   | 13.4             |         | no                           | 27                            | -7; t(3;3)             | -                               | yes                               | no                        | 20%                                      | no                                                     |
| 13   | D1481   | M   | T-MDS/AML  | 10.1             |         | no                           | 25                            | Del(3q)                | PTPN11, WT1                     | yes                               | no                        | 20%                                      | no                                                     |
| 14   |         | M   | Refr AML   | 16.3             |         | no                           | N/A                           | Complex                | -                               | yes                               | no                        | 0%                                       | no                                                     |
| 15   |         | F   | Rel AML    | 17.4             |         | no                           | 0%                            | t(6;11)                | MLL-AFDN                        | yes                               | yes (1)                   | 0%                                       | yes (skin disease)                                     |
| 16   |         | F   | T- MDS/AML | 6.6              |         | no                           | 44                            | t(11;19)               | MLL-ENL                         | yes                               | yes (1)                   | 5%                                       | no                                                     |
| 17   | D1478   | F   | T- MDS/AML | 9.1              |         | no                           | 38                            | -7                     | TP53                            | yes                               | no                        | 75%                                      | no                                                     |
| 18   | D1538   | M   | T- MDS/AML | 14.2             |         | no                           | 48                            | -7                     | CBL, KRAS, ASXL2                | yes                               | no                        | 48%                                      | no                                                     |
| 19   |         | M   | Rel AML    | 12               |         | no                           | 36                            | t(7;12)                | ETV6                            | yes                               | yes (2)                   | 0%                                       | no                                                     |
| 20   | D1263   | M   | Rel AML    | 13.4             |         | no                           | 44                            | Normal                 | WT1                             | yes                               | yes (1)                   | 44%                                      | no                                                     |
| 21   |         | F   | Rel AML    | 17               |         | no                           | 9                             | t(6;9)                 | FLT3-ITD,DEK-CAN                | yes                               | yes (2)                   | 9%                                       | no                                                     |
| 22   | D1495   | M   | Refr AML   | 15               |         | no                           | 20                            | Normal                 | NF1-                            | yes                               | no                        | 18%                                      | no                                                     |
| 23   |         | M   | Rel AML    | 2.9              |         | no                           | 60                            | t(9;11)                | MLL-AF9                         | yes                               | yes (1)                   | 60%                                      | no                                                     |
| 24   | D1503   | M   | MDS        | 17               | MDS-EB  | no                           | 20                            | Normal                 | FLT3-ITD, WT1                   | yes                               | no                        | 56%                                      | no                                                     |
| 25   | D1359   | M   | Rel AML    | 5.7              |         | no                           | 55                            | Normal                 | CEBPA, WT1, KRAS, SMC1A         | yes                               | yes (2)                   | 55%                                      | no                                                     |
| 26   |         | M   | Rel AML    | 8.8              |         | ATM and BRCA1 heterozygosis  | 10                            | Normal                 | -                               | yes                               | no                        | 9%                                       | no                                                     |
| 27   |         | F   | Rel AML    | 2.4              |         | no                           | 10                            | t(16;16)               | CBFA2T3-Glis2                   | yes                               | yes (1)                   | 10%                                      | no                                                     |
| 28   |         | F   | Refr AML   | 1.7              |         | no                           | 80                            | t(16;16)               | CBFA2T3-Glis2                   | yes                               | yes (1)                   | 4%                                       | yes (mastoid)                                          |
| 29   | D1272   | M   | MDS        | 14.3             | MDS-EB  | no                           | 5                             | N/A                    | WT1, FLT3-ITD                   | yes                               | yes (1)                   | 48%                                      | no                                                     |
| 30   |         | M   | Rel AML    | 8.3              |         | no                           | 14                            | t(10;11)               | MLL-AF10                        | yes                               | yes (1)                   | 14%                                      | no                                                     |
| 31   |         | F   | T-MDS/AML  | 6.6              |         | no                           | 95                            | t(9;11)                | MLL-AF9                         | yes                               | no                        | 5%                                       | no                                                     |

¶ Patient 10 was included in a previous publication: Raedler J, Heyde S, Kolokythas M, Eichinger A, Binder V, Schmid I, Klein C, Feuchtinger T, Albert MH. Venetoclax and decitabine for relapsed paediatric myelodysplastic syndrome-related acute myeloid leukemia with complex aberrant karyotype after second stem cell transplantation. *Br J Haematol.* 2020 Jun;189(6):e251-e254. doi: 10.1111/bjh.16682. Epub 2020 Apr 28. PMID: 32342493.

† In parentheses the number of previous allogenic HSCT received

‡ cytogenetic and molecular aberrations were reported if present at the time of venetoclax start

**Supplementary Table S2:** Detailed information regarding venetoclax-based treatments and responses. CR: complete response; CRi: CR with incomplete count recovery; NR: non-response; PR: partial response; TF: treatment failure; ara-c: cytarabine; fluda: fludarabine; MRD: minimal residual disease; FCM-: flow cytometry; PCR-: polymerase chain reaction

| ID | N cycles | N monotherapy | N azacitidine | N ara-c | N fluda + ara-c | N decitabine | N fluda + ara-C + idarubicine | N others                      | best response at any time | response to venetoclax therapy                                                                                           | days of therapy | dose (mg)            | dose (mg/m2/die) |
|----|----------|---------------|---------------|---------|-----------------|--------------|-------------------------------|-------------------------------|---------------------------|--------------------------------------------------------------------------------------------------------------------------|-----------------|----------------------|------------------|
| 1  | 1        | 0             | 0             | 0       | 0               | 0            | 1                             | 0                             | PR                        | PR                                                                                                                       | 14              | 200                  | 200              |
| 2  | 2        | 0             | 0             | 0       | 1               | 0            | 1                             | 0                             | CR                        | FCM-MRD neg                                                                                                              | 14              | 200                  | 266              |
| 3  | 1        | 0             | 0             | 0       | 0               | 0            | 2                             | 0                             | NR                        | NR                                                                                                                       | 11              | 200                  | 120              |
| 4  | 2        | 0             | 0             | 0       | 0               | 0            | 2                             | 0                             | CR                        | CRi                                                                                                                      | 14              | 300                  | N/A              |
| 5  | 1        | 0             | 0             | 0       | 1               | 0            | 0                             | 0                             | CR                        | FCM-MRD neg                                                                                                              | 18              | 400                  | 240              |
| 6  | 2        | 0             | 0             | 0       | 2               | 0            | 0                             | 0                             | CR                        | CRi                                                                                                                      | 17              | 200                  | 208              |
| 7  | 2        | 0             | 0             | 0       | 1               | 0            | 0                             | 1 (fluda + araC + lipos doxo) | CR                        | CRi                                                                                                                      | 14              | 400 (1.66)           | 240              |
| 8  | 2        | 0             | 0             | 0       | 0               | 0            | 2                             | 0                             | CR                        | CRi                                                                                                                      | 28              | 100                  | 166              |
| 9  | 1        | 0             | 0             | 0       | 0               | 0            | 0                             | 1 (ara-C+idarubicine)         | NR                        | NR                                                                                                                       | 28              | 200-400              | 360              |
| 10 | 6        | 1             | 0             | 0       | 0               | 5            | 0                             | 0                             | CR                        | morphological; CR after 2 cycles maintained for 10 months; subsequent relapse, received other 3 cycles with PR then HSCT | 28              | 20-50-100-200-400 mg | 360              |
| 11 | 15       | 0             | 15            | 0       | 0               | 0            | 0                             | 0                             | PR                        | PR (stable disease); after 15 cycles BM 15% blasts, received AML induction therapy                                       | 28              | 170                  | 360              |
| 12 | 1        | 0             | 1             | 0       | 0               | 0            | 0                             | 0                             | NR                        | NR                                                                                                                       | 28              | 400                  | 307              |
| 13 | 1        | 0             | 1             | 0       | 0               | 0            | 0                             | 0                             | NR                        | NR                                                                                                                       | 28              | N/A                  | 360              |
| 14 | 2        | 0             | 2             | 0       | 0               | 0            | 0                             | 0                             | CR                        | FCM-MRD neg                                                                                                              | 28              | N/A                  | N/A              |
| 15 | 7        | 0             | 7             | 0       | 0               | 0            | 0                             | 0                             | CR                        | PCR-MRD neg (medullary); extramedullary CR (PET-FDG and skin biopsy neg after 7 cycles)                                  | 28              | 400                  | 307              |
| 16 | 5        | 0             | 5             | 0       | 0               | 0            | 0                             | 0                             | PR                        | PR                                                                                                                       | 24              | N/A                  | 270              |
| 17 | 1        | 0             | 1             | 0       | 0               | 0            | 0                             | 0                             | PR                        | PR                                                                                                                       | 28              | 170                  | 360              |
| 18 | 2        | 0             | 2             | 0       | 0               | 0            | 0                             | 0                             | CR                        | morphological                                                                                                            | 28              | 250                  | 360              |
| 19 | 2        | 0             | 1             | 0       | 0               | 1            | 0                             | 0                             | NR                        | NR                                                                                                                       | 28              | N/A                  | 200              |
| 20 | 2        | 0             | 2             | 0       | 0               | 0            | 0                             | 0                             | CR                        | morphological                                                                                                            | 28              | 400-100              | 360              |
| 21 | 3        | 0             | 3             | 0       | 0               | 0            | 0                             | 0                             | PR                        | PR                                                                                                                       | 28              | 400                  | N/A              |
| 22 | 1        | 0             | 1             | 0       | 0               | 0            | 0                             | 0                             | CR                        | CRi                                                                                                                      | 28              | N/A                  | 360              |
| 23 | 2        | 0             | 2             | 0       | 0               | 0            | 0                             | 0                             | PR                        | PR after 1 cycle; received a 2nd cycle with NR                                                                           | 22              | 200                  | 344              |
| 24 | 1        | 0             | 1             | 0       | 0               | 0            | 0                             | 0                             | NR                        | NR                                                                                                                       | 26              | 400                  | 360              |
| 25 | 4        | 1             | 3             | 0       | 0               | 0            | 0                             | 0                             | NR                        | NR                                                                                                                       | 28              | 170                  | 360              |
| 26 | 1        | 0             | 1             | 0       | 0               | 0            | 0                             | 0                             | CR                        | morphological                                                                                                            | 16              | 200                  | 217              |
| 27 | 1        | 0             | 1             | 0       | 0               | 0            | 0                             | 0                             | NR                        | NR                                                                                                                       | 21              | 200                  | 500              |
| 28 | 1        | 0             | 1             | 0       | 0               | 0            | 0                             | 0                             | TF                        | TF for severe pancytopenia                                                                                               | 9               | 250                  | N/A              |
| 29 | 2        | 0             | 1             | 1       | 0               | 0            | 0                             | 0                             | CR                        | morphological                                                                                                            | 28              | 400                  | 360              |
| 30 | 4        | 1             | 2             | 0       | 1               | 0            | 0                             | 0                             | CR                        | FCM-MRD neg                                                                                                              | 28              | N/A                  | 360              |
| 31 | 2        | 0             | 1             | 0       | 1               | 0            | 0                             | 0                             | CR                        | PCR-MRD neg                                                                                                              | 28              | 300                  | N/A              |

**Supplementary Table S3:** Detailed information regarding hematopoietic stem cell transplantations and outcomes. HSCT: hematopoietic stem cell transplantation; MUD: matched unrelated donor; MMUD: mismatch unrelated donor; haplo: haploidentical; TT: thiotepa; Bu: busulfan; Mel: melphalan; Cy: cyclophosphamide; VP16, etoposide; Flu, fludarabine; TBI: total body irradiation; Treo: treosulfan; CC: complete chimerism; MC: mixed chimerism; TRM: transplant-related mortality; IFI: invasive fungal infection; N/A: not available

| ID | HSCT | Venetoclax therapy as bridge to HSCT | Conditioning | Donor     | Last chimerism | Follow-up after transplant (months) | dead/alive at the end of follow-up | state of disease (if live) | Cause of death              |
|----|------|--------------------------------------|--------------|-----------|----------------|-------------------------------------|------------------------------------|----------------------------|-----------------------------|
| 1  | yes  | yes                                  | TBI-Mel      | MMUD 9/10 | CC             | 21.0                                | alive                              | absent                     |                             |
| 2  | yes  | yes                                  | Bu-Cy-Mel    | sibling   | CC             | 5.3                                 | alive                              | absent                     |                             |
| 3  | yes  | no                                   | TBI-TT-Mel   | haplo     | CC             | 4.4                                 | alive                              | absent                     |                             |
| 4  | yes  | yes                                  | Bu-Cy-Mel    | MMUD 9/10 | CC             | 4.1                                 | alive                              | absent                     |                             |
| 5  | yes  | yes                                  | TBI-Mel      | haplo     | CC             | 5.5                                 | alive                              | absent                     |                             |
| 6  | yes  | yes                                  | TBI-VP16     | haplo     | CC             | 1.7                                 | alive                              | absent                     |                             |
| 7  | yes  | yes                                  | Bu-Cy-Mel    | MMUD 9/10 | CC             | 1.6                                 | alive                              | absent                     |                             |
| 8  | yes  | yes                                  | TBI-VP16     | MUD       | CC             | 1.2                                 | alive                              | absent                     |                             |
| 9  | no   | no                                   |              |           |                |                                     | dead                               |                            | disease progression         |
| 10 | yes  | yes                                  | Flu-Cy-Mel   | Haplo     | N/A            | 1.1                                 | dead                               |                            | TRM                         |
| 11 | yes  | yes                                  | Bu-Cy-Mel    | MUD       | N/A            | 6.9                                 | alive                              | absent                     |                             |
| 12 | yes  | no                                   | TBI-Mel      | sibling   | N/A            | 16.5                                | dead                               |                            | disease progression         |
| 13 | yes  | yes                                  | Bu-Cy-Mel    | MUD       | N/A            | 12.1                                | alive                              | absent                     |                             |
| 14 | yes  | yes                                  | Bu-TT-Flu    | haplo     | CC             | 9.3                                 | alive                              | absent                     |                             |
| 15 | no   | no                                   |              |           |                |                                     | alive                              | absent                     |                             |
| 16 | no   | no                                   |              |           |                |                                     | dead                               |                            | disease progression         |
| 17 | yes  | yes                                  | Flu-Mel-TT   | Haplo     | MC             | 7.4                                 | alive                              | absent                     |                             |
| 18 | yes  | yes                                  | Flu-Bu       | MUD       | N/A            | 6.0                                 | alive                              | absent                     |                             |
| 19 | no   | no                                   |              |           |                |                                     | dead                               |                            | disease progression and IFI |
| 20 | yes  | yes                                  | TT-Treo-Flu  | MUD       | CC             | 4.9                                 | dead                               |                            | TRM                         |
| 21 | no   | no                                   |              |           |                |                                     | dead                               | present                    | disease progression         |
| 22 | yes  | yes                                  | Flu-Bu       | MUD       | N/A            | 3.4                                 | alive                              | absent                     |                             |
| 23 | no   | no                                   |              |           |                |                                     | dead                               |                            | disease progression and IFI |
| 24 | yes  | yes                                  | Bu-Cy-Mel    | MUD       | CC             | 2.8                                 | dead                               |                            | TRM                         |
| 25 | no   | no                                   |              |           |                |                                     | dead                               |                            | disease progression         |
| 26 | yes  | yes                                  | TBI-TT-Mel   | sibling   | CC             | 1.7                                 | alive                              | absent                     |                             |
| 27 | no   | no                                   |              |           |                |                                     | dead                               |                            | disease progression         |
| 28 | no   | no                                   |              |           |                |                                     | dead                               |                            | disease progression         |
| 29 | yes  | yes                                  | TBI-Flu      | MUD       | MC             | 5.9                                 | dead                               |                            | relapse post HSCT           |
| 30 | yes  | yes                                  | Bu-Cy-Mel    | haplo     | CC             | 2.5                                 | alive                              | absent                     |                             |
| 31 | yes  | yes                                  | Bu-Cy-Mel    | MUD       | N/A            | 2.3                                 | alive                              | absent                     |                             |
